# Supplementary material
Source: publisher figshare collection journal article supplement (https://future-science-group.figshare.com/ndownloader/files/31484933)
Supplement: Supplementary file 1 [file 31484933]

## Article details

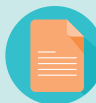

### Title of article

Olaparib with or without bevacizumab or bevacizumab and 5-fluorouracil in advanced colorectal cancer: Phase III LYNK-003

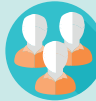

### Authors

Tae Won Kim, Julien Taieb, Ellen B. Gurary, Nati Lerman, Karen Cui, and Takayuki Yoshino

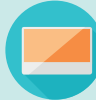

### Article URL

<https://www.futuremedicine.com/doi/10.2217/fon-2021-0899>

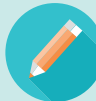

### Trial registration number

NCT04456699

## Primary objectives/rationale

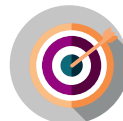

### Primary objective

Compare PFS with olaparib alone or olaparib plus bevacizumab versus bevacizumab plus 5-FU in patients with unresectable or metastatic CRC that has not progressed on first-line FOLFOX plus bevacizumab. PFS will be assessed per RECIST v1.1 by BICR

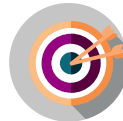

### Secondary objectives

- Evaluation of OS, ORR, and DOR per RECIST v1.1 by BICR
- Safety of olaparib alone and olaparib plus bevacizumab

## Key eligibility criteria

- ✓ Aged 18 years
- ✓ Histologically confirmed metastatic or unresectable (stage IV) CRC
- ✓ ECOG performance status of 0 or 1
- ✓ Adequate organ function
- ✓ Patients must not have progressed after a first-line induction course of  $\geq 6$  cycles of FOLFOX (folinic acid, 5-FU, oxaliplatin) plus bevacizumab
- ✓ Patients must have experienced toxicity with oxaliplatin, which in the opinion of the treating physician warranted treatment discontinuation

## Study design and treatment, including planned sample size, planned study period, and study procedures

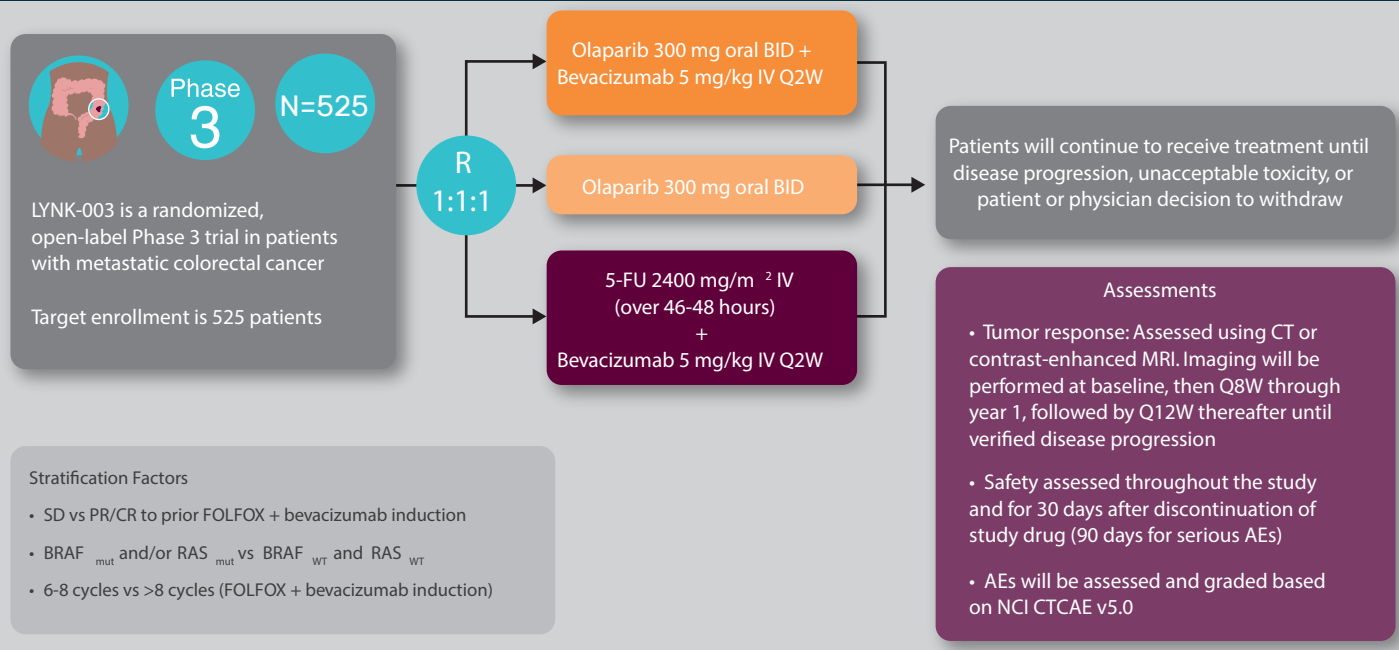

## Outcome measures/end points

### Primary end points

PFS per RECIST v1.1 by BICR. The study will meet its primary objective if either olaparib alone or olaparib plus bevacizumab provides longer PFS vs bevacizumab plus 5-FU

### Secondary end points

OS, ORR, and DOR per RECIST v1.1 by BICR; safety

### Exploratory end points

Include PFS2 by investigator assessment; HRQoL using the EORTC QLQ-C30, EORTC QLQ-C29, and EQ-5D-5L instruments; molecular biomarkers and pharmacokinetics of olaparib alone and olaparib plus bevacizumab

## Glossary

5-FU, 5-fluorouracil; AE, adverse event; BICR, blinded independent central review; BID, twice daily; CR, complete response; CRC, colorectal cancer; CT, computed tomography; CTCAE, Common Terminology Criteria for Adverse Events; DOR, duration of response; ECOG, Eastern Cooperative Oncology Group; FOLFOX, folinic acid, 5-FU, and oxaliplatin; HRQoL, health-related quality of life; IV, intravenous; MRI, magnetic resonance imaging; NCI, National Cancer Institute; ORR, objective response rate; OS, overall survival; PFS, progression-free survival; PFS2, time from randomization to second documented disease progression or death due to any cause, whichever occurs first; PO, orally; PR, partial response; Q2W, every 2 weeks; Q8W, every 8 weeks; Q12W, every 12 weeks; R, randomization; RECIST v1.1, Response Evaluation Criteria in Solid Tumors version 1.1; SD, stable disease.
